## RESEARCH ARTICLE

## Spatial distribution of the Shannon entropy for mass spectrometry imaging

Lili Xu<sup>1</sup>, Kenji Kikushima<sup>1,2,3</sup>, Shumpei Sato<sup>1,2</sup>, Ariful Islam<sup>1</sup>, Tomohito Sato<sup>1,2</sup>, Shuhei Aramaki<sup>1</sup>, Chi Zhang<sup>1</sup>, Takumi Sakamoto<sup>1,2</sup>, Fumihiro Eto<sup>1,2</sup>, Yutaka Takahashi<sup>1,2</sup>, Ikuko Yao<sup>1,4</sup>, Manabu Machida<sup>5,6</sup>, Tomoaki Kahyo<sup>1,2</sup>, Mitsutoshi Setou<sup>1,2,5\*</sup>

**1** Department of Cellular and Molecular Anatomy, Hamamatsu University School of Medicine, Hamamatsu, Shizuoka, Japan, **2** International Mass Imaging Center, Hamamatsu University School of Medicine, Hamamatsu, Shizuoka, Japan, **3** Graduate School of Medical Sciences Department of Integrative Anatomy, Nagoya City University, Nagoya, Aichi, Japan, **4** Department of Biomedical Sciences, School of Biological and Environmental Sciences, Kwansei Gakuin University, Sanda, Hyogo, Japan, **5** Department of Systems Molecular Anatomy, Institute for Medical Photonics Research, Preeminent Medical Photonics Education & Research Center Hamamatsu, Hamamatsu, Shizuoka, Japan, **6** JST, PRESTO, Kawaguchi, Saitama, Japan

\* [setou@hama-med.ac.jp](mailto:setou@hama-med.ac.jp)

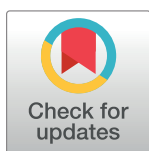

## OPEN ACCESS

**Citation:** Xu L, Kikushima K, Sato S, Islam A, Sato T, Aramaki S, et al. (2023) Spatial distribution of the Shannon entropy for mass spectrometry imaging. PLoS ONE 18(4): e0283966. <https://doi.org/10.1371/journal.pone.0283966>

**Editor:** Joseph Banoub, Fisheries and Oceans Canada, CANADA

**Received:** November 16, 2022

**Accepted:** March 21, 2023

**Published:** April 6, 2023

**Copyright:** © 2023 Xu et al. This is an open access article distributed under the terms of the [Creative Commons Attribution License](https://creativecommons.org/licenses/by/4.0/), which permits unrestricted use, distribution, and reproduction in any medium, provided the original author and source are credited.

**Data Availability Statement:** All data are contained within the paper and its [Supporting information](#) files.

**Funding:** Financial Disclosure: This research was funded by MEXT Project for promoting public utilization of advanced research infrastructure (Imaging Platform), grant number JPMXS0410300220, AMED, grant numbers JP20gm0910004 and 21ak0101179, JSPS KAKENHI, grant number JP18H05268, and the HUSM Grant-in-Aid, grant number 1013511.

## Abstract

Mass spectrometry imaging (MSI) allows us to visualize the spatial distribution of molecular components in a sample. A large amount of mass spectrometry data comprehensively provides molecular distributions. In this study, we focus on the information in the obtained data and use the Shannon entropy as a quantity to analyze MSI data. By calculating the Shannon entropy at each pixel on a sample, the spatial distribution of the Shannon entropy is obtained from MSI data. We found that low-entropy pixels in entropy heat maps for kidneys of mice had different structures between two ages (3 months and 31 months). Such changes cannot be visualized by conventional imaging techniques. We further propose a method to find informative molecules. As a demonstration of the proposed scheme, we identified two molecules by setting a region of interest which contained low-entropy pixels and by exploring changes of peaks in the region.

## Introduction

Mass spectrometry imaging (MSI) enables us to acquire mass spectra and to visualize the spatial distribution of analytes simultaneously by ionizing them from the surface of a sample and identifying molecules [1–3]. The large amount of data gathered from MSI prompts us to explore physiological functions and pathological correlations.

Current progress in biological analyses enables instant access to massive amounts of data describing the detailed conditions of biological samples, initiating bioinformatics studies, and bringing great revolutions to biology and medicine [4]. The concept of the Shannon entropy has been applied to analyze these big data obtained from the biological samples. The Shannon entropy is commonly utilized in biology to measure diversity and defines how cells, genes, or molecules distribute and interact [5]. Initially, the Shannon entropy was utilized to represent the randomness of the DNA sequence composed of four nucleotides: adenine (A), cytosine

**Competing interests:** The authors declare no conflict of interest.

(C), guanine (G) and thymine (T) [6, 7]. Since then, various kinds of entropy have been used on the genome: the metric entropy [8], the Renyi entropy [9], the diffusion entropy [10], and the topological entropy [11]. In systems biology, the amount of information is described by the Shannon entropy [12] and has been applied to examining the robustness of the signaling transmission through the different omics layers such as transcriptomics, proteomics, and metabolomics [13]. The Shannon entropy calculated from MSI data from peanuts was used to identify advanced glycation end products [14]. The use of the Shannon entropy for RNA-seq datasets was also proven to be useful for a quick and in-depth analysis of changes in the gene expressions [15]. Antibodies in human blood were detected by a peptide microarray, and the Shannon entropy calculated from the profile is proposed as an indicator of the health status of individuals and populations [16].

Initially, entropy was introduced in mass spectrometry as a tool to detect the pattern of a complex spectrum in extracting molecular information [17, 18]. Later, entropy was used to align high-resolution images [19] and to determine the spatial correspondences between the MSI data and the histological image for overlays [20]. See a book by Kaltashov and Eyles [21] and a review article by Aoyagi [22] about how entropy has been used in MSI. Moreover, the spectral binning was investigated with the Shannon entropy [23]. In [24], the Shannon entropy was used to match mass spectra to peptides and proteins. In [25], a data-targeted extraction method for metabolite annotation was proposed for liquid chromatography-high-resolution mass spectrometry.

Recently, entropy has started to be recognized as a physical quantity to be imaged not only a mathematical tool for MSI data processing. Aoyagi and her collaborators proposed a method based on the information entropy (Shannon entropy) for time-of-flight secondary ion mass spectrometry (TOF-SIMS) and showed that without peak identification the spatial distribution (heat maps) of the Shannon entropy of spectra indicates differences in materials and changes in the conditions of a material in a sample [26].

In this paper, we consider the information in the whole mass spectrum by observing the Shannon entropy and obtain the spatial distribution of the information by entropy heat maps for the matrix-assisted laser desorption/ionization (MALDI) MSI. In [27], mass spectral patterns were used for segmentation by deep learning but it was difficult to grasp the physical meaning of mass spectral patterns. In this study, we found that the spatial distribution of the Shannon entropy provides new images which contain information that cannot be obtained from images by optical microscopy nor conventional MSI. With entropy heat maps, we propose a method to select candidate peaks.

## Materials and methods

### Animals

For the mouse kidneys, C57BL/6JmsSlc male mice of 3- and 31-month-old were used in the experiment. All mice were born in our animal facility and their parents were purchased from SLC (Hamamatsu, Japan). These mice were housed in a controlled environment with a 12:12-h light-dark cycle under standard laboratory chow and water. All experiments in this study were performed in accordance with the guidelines issued by the Institutional Animal Care and Use Committees of Hamamatsu University, School of Medicine, Japan (approval code: 2015028) and carried out in accordance with the approved guidelines.

### Sample preparation

Two mice were sacrificed by cervical dislocation, and immediately thereafter their kidneys were dissected and subsequently frozen in powdered dry ice. Stored organs at  $-80^{\circ}\text{C}$  were

sliced with a thickness of 10  $\mu\text{m}$  using a cryostat microtome at  $-20^{\circ}\text{C}$  (Leica CM1950, Leica Microsystems). The slices were mounted onto the indium tin oxide-coated glass slides (ITO glass, Matsunami Glass Ind., Ltd., Osaka, Japan) and stored again at  $-80^{\circ}\text{C}$  in 50 mL Falcon tubes containing silica gel. Samples were coated with 9-aminoacridine (9AA; Merck Millipore, Darmstadt, Germany) solution at 10 mg/mL dissolved in 70% ethanol, as a matrix by an automatic sprayer (TM-Sprayer, HTX Technologies, North Carolina (NC), USA), soon before the MALDI MSI observation.

## MALDI-MSI

The MALDI-MSI observations of the kidney samples from the three mice were performed by iMScope (Shimadzu, Kyoto, Japan), as our previous study [28]. The best condition of the matrix and the mass range was determined, in which the signal from the samples is efficiently detected as a wide range of  $m/z$  as possible, and separated from the noise from the background and matrix. We set the condition as follows: with 9-AA matrix, mass spectra of the  $m/z$  range of 550–1050 were acquired under negative ion mode, with the scan pitch of 50  $\mu\text{m}$  and a laser diameter of 25  $\mu\text{m}$ . The laser strength was set to be 60%, and the number of irradiations was 500.

The negative ion mode was used with adduct type of  $[\text{M}-\text{H}]^{-}$  and Molecular Mass Tolerance of  $\pm 0.2$  Da. Lock mass correction was performed using  $m/z$  885.5493 (for  $m/z > 500$ ) to achieve better mass accuracy [29] and candidate selection with higher precision [30].  $m/z$  885.5493 was annotated as phosphatidylinositol (PI)(38:4) [29].

## Shannon entropy calculation from MALDI-MSI data

Mass spectrum data was acquired by MALDI-MSI analysis. We used IMDX converter (Shimadzu Corporation, Kyoto, Japan) and IMAGEREVEAL™ MS software (Shimadzu Corporation, Kyoto, Japan) to get numerical data from the mass spectra. All peaks from the mass spectra were included for calculation. Let  $P_i(x, y)$  denote the  $i$ th peak intensity in the mass spectrum at point  $(x, y)$  on the sample. We introduced the relative intensity as

$$p_i(x, y) = \frac{P_i(x, y)}{\sum_{i=1}^n P_i(x, y)}, \quad (1)$$

where  $n$  is the number of peaks in the mass spectrum. Then we defined the Shannon entropy  $H(x, y)$  for the spot at  $(x, y)$  on the sample as

$$H(x, y) = - \sum_{i=1}^n p_i(x, y) \log_2 p_i(x, y). \quad (2)$$

The entropy heat map can be drawn with  $H(x, y)$ . We note that the Shannon entropy depends on the number  $n$  of peaks ( $0 \leq H(x, y) \leq \log_2 n$ ). The entropy  $H(x, y)$  reaches the maximum when all  $p_i(x, y)$  are equiprobable. The Shannon entropy is high when the system contains much information and little certainty. The Shannon entropy is low when the number of possible values is small and the system is not random.

## Shannon entropy heat maps

In the case of rat brain data, Wister male rats aged 8 weeks were used in the experiment. The MSI data of the rat brain data was previously obtained in our group by MALDI equipped with the Fourier transform ion cyclotron resonance mass spectrometry (FT-ICR) MSI (Solarix XR, Bruker Daltonics) with DHB matrix using iMLayer (Shimadzu Corporation, Kyoto, Japan)

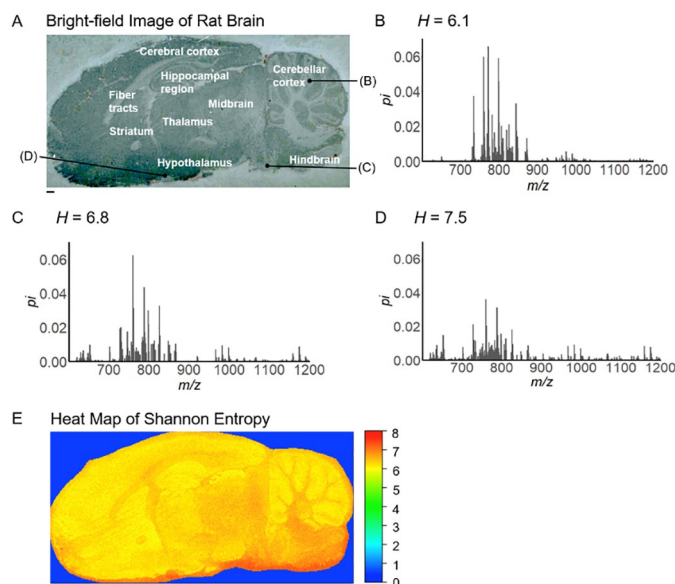

**Fig 1. Shannon entropy calculated from the mass spectrum.** (A) The bright-field image of the sagittal rat brain using MALDI-FT-ICR-MSI with 2,5-dihydroxybenzoic acid (DHB) matrix [20]. (B–D) Mass spectra at three different spots on the rat brain ( $p_i$ : relative mass spectral intensity). At these spots, Shannon entropy values were 6.1 (B), 6.8 (C), and 7.5 (D), respectively. (E) The heat map of the Shannon entropy from the rat brain. The scale bar denotes 1 mm.

<https://doi.org/10.1371/journal.pone.0283966.g001>

[31]. The bright-field image of the brain is shown in Fig 1A. Mass spectra at three different spots on the sample of the rat brain had different behavior (Fig 1B–1D). Upon the MSI measurement, the mass spectrum was acquired from each spot on the samples. We note that the Shannon entropy becomes high when the mass spectrum is uniformly distributed. Indeed, the Shannon entropy  $H$  for Fig 1B–1D was  $H = 6.1$ ,  $6.8$ , and  $7.5$ , respectively.

Fig 1E shows the heat map of the Shannon entropy which is calculated from the mass spectrum at each spot. By comparing Fig 1A and 1E, we found that the entropy heat map reflected the anatomical structure. For instance, entropy values were relatively low (color close to yellow) in many parts of gray matter, including the cerebral cortex, hippocampal region, striatum, and cerebellar cortex. In contrast, entropy values are relatively high (color close to red) in many parts of the fiber tracts.

## Method to identify related peaks

With the help of entropy heat maps, we can find peaks related to a control parameter such as age. Our proposed method consists of the following four steps.

Step 1. Obtain entropy heat maps for different values of the control parameter and find a region in the heat maps which show a clear dependence on the control parameter. That is, a region of interest (ROI) is determined. Once an ROI is chosen for a heat map, ROIs must be set in the same area for other heat maps with different values of the control parameter.

Step 2. In the ROI, we calculate the sum of intensities for each peak in the spectrum. Sums are calculated for each value of the control parameter. Summed intensities are further normalized by using the sum from one value of the control parameter.

Step 3. The dependence of the normalized sums of intensities on the control parameter is investigated. Informative peaks are selected in the mass spectrum as peaks which significantly depend on the control parameter.

Step 4. Candidate molecules are identified from the selected peaks.

The workflow for our method to identify candidate molecules is illustrated in [S1 Fig](#). Assignments of all candidate molecules were conducted with a good mass accuracy using the Human Metabolome Database (metabolite identification confidence level 3). The choice of the ROI in Step 1 is not unique. Depending on ROIs, different candidate peaks might be identified. Then it should be determined by the targeted MSI if the identified peaks are most important for the control parameter. The proposed scheme helps identify a few candidate peaks from hundreds of intensities on the  $m/z$  spectrum.

## Results

### Shannon entropy for the young and old kidneys

Shannon entropy heat maps for MSI were produced using young and old kidneys. The Shannon entropy was calculated from the MSI data acquired by MALDI equipped with the time-of-flight mass spectrometer (TOF-MS) for the kidneys of 3- and 31-month mice. [Fig 2A and 2C](#) shows Shannon entropy heat maps of these kidneys. For both kidneys, high entropy regions (marked in black arrows) were seen in the pelvis and the renal capsule. The number of low-entropy pixels increased for the 31-month kidney. For example, a low-entropy region (i.e., a group of low-entropy pixels) in the renal cortex (marked by a black dashed line) appeared. The histograms in [Fig 2E and 2F](#) show frequency distributions of the Shannon entropy for both kidneys. The histograms were normalized by the number of pixels. The average entropy of the

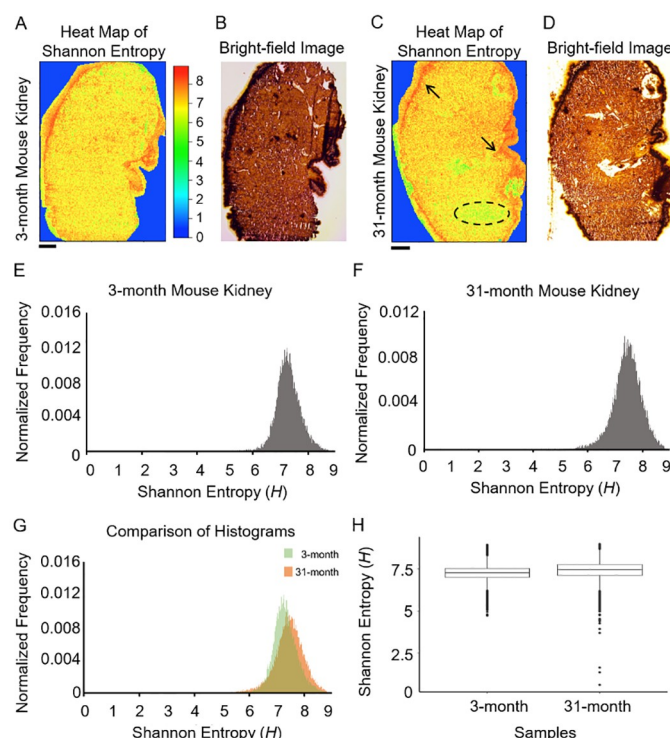

**Fig 2. Shannon entropy for the two kidneys.** Entropy heat maps (A and C) and bright-field images (B and D) are shown for the 3- and 31-month mouse kidneys, respectively. Black arrows show examples of high entropy regions. A low-entropy region which appeared only for the 31-month kidney was marked by a black dashed oval. (E and F) Histograms of the Shannon entropy of two samples. (G) The two histograms were superimposed. (H) Box plots for the 3- and 31-month kidneys. Scale bars denote 1 mm.

<https://doi.org/10.1371/journal.pone.0283966.g002>



3-month kidney was smaller than that of the 31-month kidney (Fig 2G). The box plots of the entropy showed the existence of the low-value outliers in the 31-month kidney (Fig 2H).

### Low entropy spots for the young and old kidneys

The distribution of all entropy values of the samples was close to Gaussian (Fig 3A). To further investigate low-entropy pixels, we introduced a threshold  $H_1$ . Among all pixels of the two samples, the smallest 1% of the pixels were defined as low entropy pixels (S1 Table) and correspondingly we set  $H_1 = 6.03$ . When comparing the 3- and 31-month kidneys, we found more low-entropy spots in the 31-month kidney (Fig 3B and 3C). Indeed, 0.66% and 1.34% of pixels were classified as low-entropy pixels, respectively (Fig 3D and 3E). A magnified image of the 31-month kidney showed that even though the individual low-entropy spots were separated, as a group they exhibited a structure-like distribution in the cortex, renal pelvis, and renal capsule (Fig 3F–3H), while no low-entropy spots were found in the cyst with hollow structures (Fig 3I).

### Identification of candidate peaks using entropy heat maps

We first determined ROIs which contained low entropy regions. The ROIs are marked by black ovals in Fig 4A and 4D. For both samples, we calculated for each  $m/z$  the sum of the

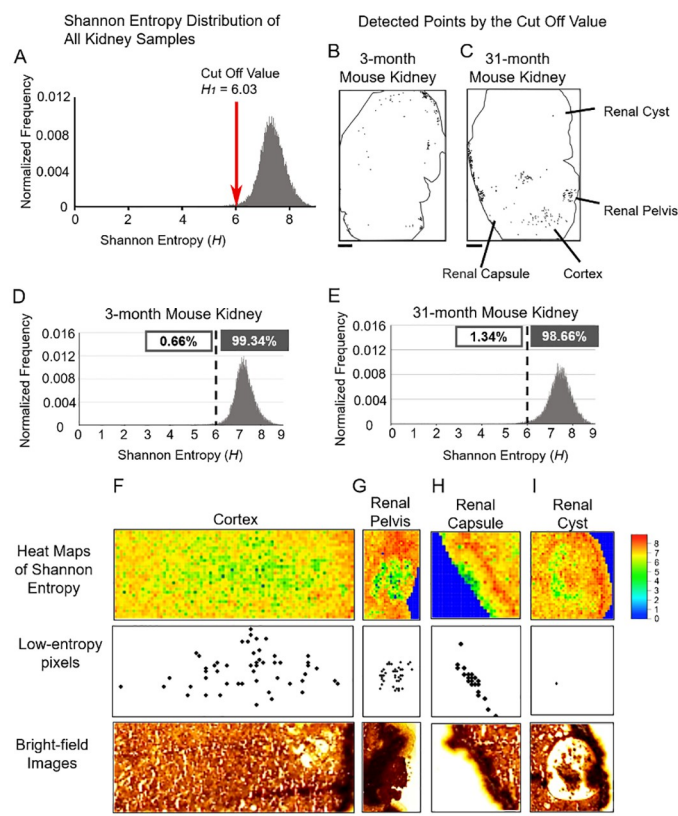

**Fig 3. Detection of low-entropy spots in the mouse kidneys.** (A) The distribution of the Shannon entropy from two kidney samples. (B–C) Low-entropy spots were plotted on the kidney images. Outlines of the kidneys are shown by black solid lines. (D–E) Histograms of the Shannon entropy for the 3- and 31-month mouse kidneys. Enlarged kidney images for the 31-month mouse of the cortex (F), pelvis (G), and the renal capsule (H) in addition to the renal cysts (I). Scale bars denote 1 mm.

<https://doi.org/10.1371/journal.pone.0283966.g003>

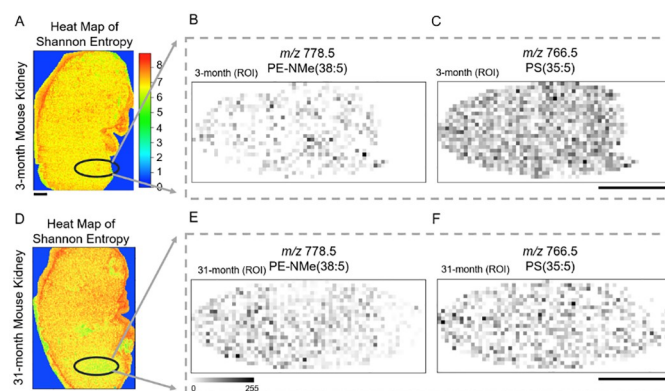

**Fig 4. ROIs for two kidneys and MALDI-MSI ion images.** (A) The entropy heat map for the 3-month kidney with the ROI marked by a black oval. (B) Ion image of  $m/z$  778.5 for the 3-month mouse. (C) Ion image of  $m/z$  766.5 for the 3-month mouse. (D) The entropy heat map for the 31-month kidney with the ROI marked by a black oval. (E) Ion image of  $m/z$  778.5 for the 31-month mouse. (F) Ion image of  $m/z$  766.5 for the 31-month mouse. Scale bars show 1 mm.

<https://doi.org/10.1371/journal.pone.0283966.g004>

intensities for the pixels in ROIs. Then for each  $m/z$ , the ratio of the summed intensity for the 31-month kidney to the summed intensity for the 3-month kidney was calculated. From the list of change ratios, two  $m/z$ 's which corresponded to the largest and smallest ratios were picked (S2 Table).

In this way, two candidates were selected which had the largest and smallest change ratios. The peak of the largest change ratio (the ratio was 4.55) was  $m/z$  778.5 and the peak of the smallest change ratio (the ratio was 0.380) was  $m/z$  766.5. We note that by focusing on a particular intensity, more precise  $m/z$  values can be obtained: the former was  $m/z$  778.5387 and the latter was  $m/z$  766.4701.

The intensity with the largest change ratio ( $m/z$  778.5387) was annotated as N-mono-methylphosphatidylethanolamine (PE-NMe) (38:5). The intensity with the smallest change ratio ( $m/z$  766.4701) was annotated as phosphatidylserine (PS)(35:5). Both candidate molecules were assigned according to the Human Metabolome Database (metabolite identification confidence level 3) (see Table 1). Furthermore, we produced MALDI-MSI ion images of the molecules in the ROIs for the 3-month kidney (Fig 4B and 4C) and 31-month kidney (Fig 4E and 4F). For  $m/z$  778.5387, the average intensity for Fig 4B was smaller than that for Fig 4E. For  $m/z$  766.4701, the average intensity for Fig 4C was larger than that for Fig 4F.

### Robustness of low-entropy spots

To further investigate low-entropy spots, we changed mass and spatial resolutions for the 31-month mouse kidney. The mass resolution is commonly defined as the ability to separate two narrow mass spectral peaks. As the mass resolution gets lower, adjacent peaks become indistinguishable. At each spot, there were 2500 intensities in the  $m/z$ -axis as the interval from

**Table 1. Tentative assignments of candidate molecules.**

| kidney                    |                |                |                  |                    |                                                    |
|---------------------------|----------------|----------------|------------------|--------------------|----------------------------------------------------|
| Tentative ion attribution | Observed $m/z$ | Database $m/z$ | Mass error (ppm) | Adduct             | Formula                                            |
| PS(35:5)                  | 766.4701       | 766.4665       | 4.70             | [M-H] <sup>-</sup> | C <sub>41</sub> H <sub>70</sub> NO <sub>10</sub> P |
| PE-NMe(38:5)              | 778.5387       | 778.5392       | 0.64             | [M-H] <sup>-</sup> | C <sub>44</sub> H <sub>78</sub> NO <sub>8</sub> P  |

<https://doi.org/10.1371/journal.pone.0283966.t001>

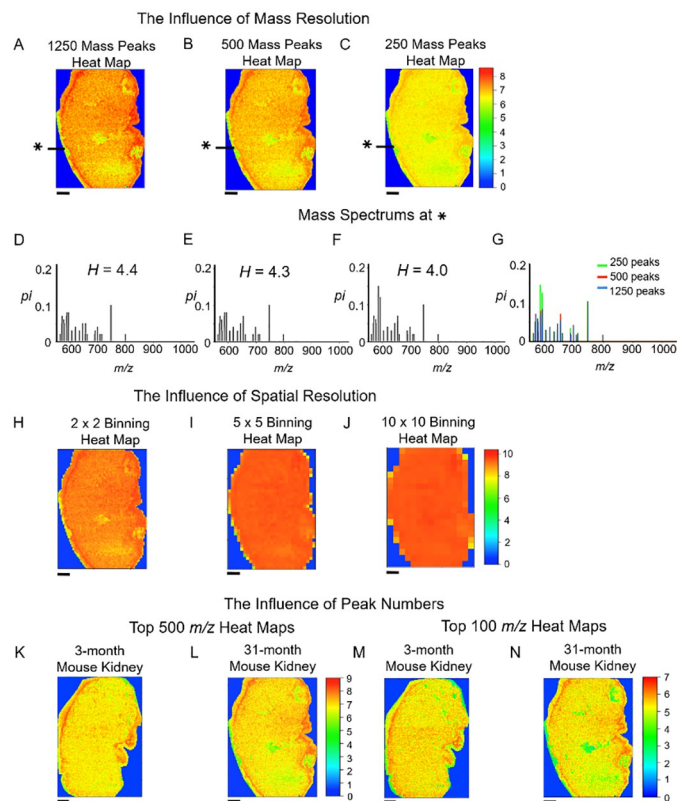

**Fig 5. Effects of mass and spatial resolutions on entropy heat maps.** (A–C) Entropy heat maps with low  $m/z$  resolutions created by the reduction of the number of intensities to (A) 1250, (B) 500, and (C) 250. (D–F) Mass spectra for three mass resolutions at the identical position (indicated \* in (A–C)). (G) Three spectra together with the original spectrum with 2500 intensities. (H–J) Reduced spatial resolutions, by the binning of pixels by the factor (H) 2, (I) 5, and (J) 10. (K–L) Entropy heat maps with top 500  $m/z$  peaks. (M–N) Entropy heat maps with top 100  $m/z$  peaks. Scale bars indicate 1 mm.

<https://doi.org/10.1371/journal.pone.0283966.g005>

$m/z$  550 to  $m/z$  1050 was split into 2500 subintervals. We took the average over every two, five, and ten neighboring intensities. Thus, we produced new heat maps with reduced numbers of peaks. As seen in Fig 5A–5C, newly obtained heat maps were more or less similar and the structure of low-entropy spots was preserved. High peaks appeared between  $m/z$  550 and 800 for all mass spectra, which had 2500, 1250, 500, and 250 intensities (Fig 5D–5G). We found that key features such as low-entropy regions remain if the mass resolution changes.

To check the influence of the spatial resolution on the distribution of Shannon entropy, we reduced the spatial resolution by binning the MSI data, i.e., we took the average of mass spectra over adjacent spatial spots on the image. Unlike the case of the  $m/z$  resolution, which made no huge change in the distribution of the Shannon entropy, the reduction of the spatial resolution severely influenced the distribution (Fig 5H–5J). The entropy distribution became almost uniform after mass spectra in 25 ( $5 \times 5$ ) adjacent pixels in the image were averaged. Thus, high spatial resolution is necessary to detect entropy changes in the heat map.

To check the influence of peak selections on the distribution of the Shannon entropy, we summed all peaks from pixels in the sample and selected the top 500 and 100  $m/z$  peaks among the summed peaks. With the top 500 and 100  $m/z$  peaks, entropy heat maps were generated for the two kidney samples (Fig 5K–5N). The heat maps were more or less similar. This implies that the contribution of small peaks was negligible.



## Discussion

Entropy heat maps reflect the anatomical structure of the sample as shown in Fig 1. This is because entropy values vary depending on the anatomical structure. Moreover, entropy heat maps reveal features in the sample which cannot be detected by other modalities. An example of such features is the appearance of low-entropy regions in the kidney. Thus the Shannon-entropy heat map provides new insights for MSI. Although age was used as a control parameter in this study, different control parameters can be used for the proposed method.

We note that the information entropy carries the information from all peaks in the range of interest on the  $m/z$  axis. In this sense, the Shannon-entropy heat map is different from an image for a specific peak. Furthermore, the Shannon-entropy heat map differs from the total ion current or total ion image (sum of all ion intensities); the former is a weighted sum which measures the degree of randomness. See [26] for the comparison between Shannon entropy and total ion heat maps.

Since all peaks in the range which is considered are taken into account when the information entropy is calculated, matrix effects are unavoidable. We emphasize that as shown in this paper informative entropy heat maps can be obtained even in the presence of matrix.

We found that in the comparison between the two kidneys, entropy changes occurred in a small part of the cortex. This means that the spatial resolution must be below 100  $\mu\text{m}$ . As written above, the laser diameter for the MSI measurements was set to 25  $\mu\text{m}$  in this study.

In this paper, we identified two molecules, PS(35:5) ( $m/z$  766.47) and PE-NMe(38:5) ( $m/z$  778.54), to illustrate the proposed method of identifying relevant molecules via entropy heat maps. The results are consistent with the findings in our previous report [32]. In the present study, the 31-month kidney had more PE-NMe(38:5) than the 3-month kidney. PE treatment was reported to increase the averaged and maximum life span [33].

In Fig 5A–5C, the influence of the spectral binning on entropy heat maps was studied. The average entropy decreases as the bin size increases. In Fig 5A, the average entropy was 5.99 for the bin size 0.4 (1250 peaks). In Fig 5B, the average entropy was 5.76 for the bin size 1.0 (500 peaks). In Fig 5C, the average entropy was 5.41 for the bin size 2.0 (250 peaks). This tendency is implied in Fig 5D–5G. The result is consistent with [23], which investigated the spectral binning for TOF-SIMS data.

A natural next step is to perform more comprehensive experiments with the proposed analysis to identify molecules which are related to aging. MSI has been successfully applied in a wide range of kidney studies [34]. Among one of those studies, we previously developed the method to detect small metabolites in the kidney by MSI [35] and identified 6 specific lipids in immunoglobulin A (IgA) induced nephropathy in the mice model [36]. For the lipidomics analysis, Moreno-Gordaliza *et al.* determined the best condition for the broadest detection and identification of renal lipids by MALDI-MSI [37, 38]. They used 9-aminoacridine (9-AA) as a matrix for the negative ion-mode lipid imaging of the kidney, which is consistent with our condition for the kidney imaging. In the future research, it must be confirmed that PE-NMe (38:5) increases and PS(35:5) decreases as age grows.

Although in this paper we focused on the mass range between  $m/z$  550 and  $m/z$  1050, it is possible to consider the entire spectrum. Metabolic changes may be studied by entropy heat maps which are obtained from a wide range of the mass spectrum that contains small mass biomolecules such as lipids and peptides.

## Conclusions

In this paper, we have introduced entropy heat maps for MSI. We showed that entropy heat maps provide new information such as low-entropy regions, which cannot be imaged by other

modalities. Furthermore, we proposed a method of detecting informative peaks in the mass spectrum from changes of entropy heat maps against a control parameter. Choosing age as a control parameter, we demonstrated how candidate molecules can be identified.

## Supporting information

**S1 Fig. Workflow of candidate molecules identification.** After extraction of data from ROIs on each sample, summation and normalization are performed for intensities of each  $m/z$ . Then the fold-change is calculated to obtain  $m/z$  with higher degree of variations. Finally, tentative assignments of all candidate molecules are performed.

(TIF)

**S2 Fig. Pixels selected in the low entropy areas of different aged mice kidneys.** Pixels selected in the low entropy of 3-month mouse kidney (A) and 31-month mouse kidney (B).

(TIF)

**S1 Table. Low-entropy spots by the cutoff at 6.03 for the 3-month kidney.**

(XLSX)

**S2 Table. Candidate peaks with change ratios (ascending order).**

(XLSX)

## Acknowledgments

We thank Prof. Hal Tasaki, Prof. Koji Ishihara, and Prof. Kunihiko Kaneko for valuable discussion and Dr. Masaki Noritaka for helpful support. L.X. owes her sincere thanks to the Uehara Memorial Foundation Research Fellowship Program to support her study in Japan.

## Author Contributions

**Conceptualization:** Lili Xu, Kenji Kikushima, Chi Zhang, Tomoaki Kahyo, Mitsutoshi Setou.

**Data curation:** Lili Xu, Kenji Kikushima, Shumpei Sato, Ariful Islam, Tomohito Sato, Chi Zhang, Takumi Sakamoto, Fumihiro Eto.

**Formal analysis:** Lili Xu, Kenji Kikushima, Shumpei Sato, Ariful Islam, Tomohito Sato, Shuhei Aramaki, Tomoaki Kahyo.

**Funding acquisition:** Lili Xu, Tomoaki Kahyo, Mitsutoshi Setou.

**Investigation:** Lili Xu, Shumpei Sato, Ariful Islam, Tomohito Sato, Chi Zhang, Takumi Sakamoto, Fumihiro Eto, Yutaka Takahashi.

**Methodology:** Lili Xu, Kenji Kikushima, Shumpei Sato, Mitsutoshi Setou.

**Project administration:** Kenji Kikushima, Tomoaki Kahyo, Mitsutoshi Setou.

**Resources:** Kenji Kikushima, Mitsutoshi Setou.

**Software:** Lili Xu, Shumpei Sato.

**Supervision:** Kenji Kikushima, Yutaka Takahashi, Ikuko Yao, Tomoaki Kahyo, Mitsutoshi Setou.

**Validation:** Lili Xu, Kenji Kikushima, Yutaka Takahashi.

**Visualization:** Lili Xu, Kenji Kikushima, Shumpei Sato.

**Writing – original draft:** Lili Xu, Kenji Kikushima, Shumpei Sato, Chi Zhang, Takumi Sakamoto, Fumihito Eto, Yutaka Takahashi, Ikuko Yao, Tomoaki Kahyo, Mitsutoshi Setou.

**Writing – review & editing:** Lili Xu, Kenji Kikushima, Manabu Machida, Tomoaki Kahyo, Mitsutoshi Setou.

## References

1. Chughtai K, Heeren RMA. Mass spectrometric imaging for biomedical tissue analysis. *Chem Rev*. 2010; 110: 3237–3277. <https://doi.org/10.1021/cr100012c> PMID: 20423155
2. Spengler B. Mass spectrometry imaging of biomolecular information. *Anal Chem*. 2015; 87: 64–82. <https://doi.org/10.1021/ac504543v> PMID: 25490190
3. Saito Y, Waki M, Hameed S, Hayasaka T, Setou M. Development of imaging mass spectrometry. *Biol Pharm Bull*. 2012; 35: 1417–1424. <https://doi.org/10.1248/bpb.b212007> PMID: 22975490
4. Aizat WM, Ismail I, Noor NM. Recent development in omics studies. *Adv Exp Med Biol*. 2018; 1102: 1–9. [https://doi.org/10.1007/978-3-319-98758-3\\_1](https://doi.org/10.1007/978-3-319-98758-3_1) PMID: 30382565
5. Roach TNF. Use and abuse of entropy in biology: A case for caliber. *Entropy*. 2020; 22: 1–8. <https://doi.org/10.3390/e22121335> PMID: 33266519
6. Schmitt AO, Herzel H. Estimating the entropy of DNA sequences. *J Theor Biol*. 1997; 188: 369–377. <https://doi.org/10.1006/jtbi.1997.0493> PMID: 9344742
7. Li J, Zhang L, Li H, Ping Y, Xu Q, Wang R, et al. Integrated entropy-based approach for analyzing exons and introns in DNA sequences. *BMC Bioinformatics*. 2019; 20: 11–13. <https://doi.org/10.1186/s12859-019-2772-y> PMID: 31182012
8. Tenreiro MacHado JA. Shannon entropy analysis of the genome code. *Math Probl Eng*. 2012; 2012. <https://doi.org/10.1155/2012/132625>
9. Vinga S, Almeida JS. Local Renyi entropic profiles of DNA sequences. *BMC Bioinformatics*. 2007; 8: 1–19. <https://doi.org/10.1186/1471-2105-8-393> PMID: 17939871
10. Zhao F, Yang H, Wang B. Complexities of human promoter sequences. *J Theor Biol*. 2007; 247: 645–649. <https://doi.org/10.1016/j.jtbi.2007.03.035> PMID: 17482648
11. Koslicki D. Topological entropy of DNA sequences. *Bioinformatics*. 2011; 27: 1061–1067. <https://doi.org/10.1093/bioinformatics/btr077> PMID: 21317142
12. Uda S. Application of information theory in systems biology. *Biophys Rev*. 2020; 12: 377–384. <https://doi.org/10.1007/s12551-020-00665-w> PMID: 32144740
13. Uda S, Saito TH, Kudo T, Kokaji T, Tsuchiya T, Kubota H, et al. Robustness and compensation of information transmission of signaling pathways. *Science (80-)*. 2013; 341: 558–561. <https://doi.org/10.1126/science.1234511> PMID: 23908238
14. Johnson KL, Williams JG, Maleki SJ, Hurlburt BK, London RE, Mueller GA. Enhanced Approaches for Identifying Amadori Products: Application to Peanut Allergens. *J Agric Food Chem*. 2016; 64: 1406–1413. <https://doi.org/10.1021/acs.jafc.5b05492> PMID: 26811263
15. Zambelli F, Mastropasqua F, Picardi E, D'Erchia AM, Pesole G, Pavesi G. RNentropy: An entropy-based tool for the detection of significant variation of gene expression across multiple RNA-Seq experiments. *Nucleic Acids Res*. 2018; 46. <https://doi.org/10.1093/nar/gky055> PMID: 29390085
16. Wang L, Whittemore K, Johnston SA, Stafford P. Entropy is a Simple Measure of the Antibody Profile and is an Indicator of Health Status: A Proof of Concept. *Sci Rep*. 2017; 7: 1–9. <https://doi.org/10.1038/s41598-017-18469-6> PMID: 29273777
17. Ferrige A G, Seddon M J, Jarvis S. Maximum entropy deconvolution in electrospray mass spectrometry. *Rapid Communications in Mass Spectrometry*. 1991; 5: 374–379. <https://doi.org/10.1002/rcm.1290050810>
18. Reinhold B B, Reinhold V N. Electrospray ionization mass spectrometry: Deconvolution by an Entropy-Based algorithm. *J Am Soc Mass Spectrom*. 1992; 3: 207–215. [https://doi.org/10.1016/1044-0305\(92\)87004-I](https://doi.org/10.1016/1044-0305(92)87004-I) PMID: 24242943
19. Broersen A, van Liere R, Altelaar A F M, Heeren R M A, McDonnell L A. Automated, feature-based image alignment for high-resolution imaging mass spectrometry of large biological samples. *J Am Soc Mass Spectrometry*. 2008; 19: 823–832. <https://doi.org/10.1016/j.jasms.2008.02.015> PMID: 18403214
20. Abdelmoula W M, Škrášková K, Balluff B, Carreira R J, Tolner E A, Lelieveldt B P F, et al. Automatic Generic Registration of Mass Spectrometry Imaging Data to Histology Using Nonlinear Stochastic Embedding. *Anal. Chem*. 2014; 86: 9204–9211. <https://doi.org/10.1021/ac502170f> PMID: 25133861
21. Kaltashov I A, Eyles S J. Mass Spectrometry in Biophysics: Conformation and Dynamics of Biomolecules (Wiley, 2005)

22. Aoyagi S. Review of TOF-SIMS bioanalysis using mutual information. *Surf. Interface Anal.* 2009; 41: 136–142. <https://doi.org/10.1002/sia.2989>
23. Madiona R M T, Alexander D L J, Winkler D A, Muir B W, Pigram P J. Information content of ToF-SIMS data: Effect of spectral binning. *Applied Surface Science.* 2019; 493: 1067–1074. <https://doi.org/10.1016/j.apsusc.2019.07.044>
24. Li Y, Kind T, Folz J, Vaniya A, Mehta S S, Fiehn O. Spectral entropy outperforms MS/MS dot product similarity for small-molecule compound identification. *Nature Methods.* 2021; 18: 1524–1531. <https://doi.org/10.1038/s41592-021-01331-z> PMID: 34857935
25. Zheng F, You L, Qin W, Ouyang R, Lv W, Guo L, et al. MetEx: A Targeted Extraction Strategy for Improving the Coverage and Accuracy of Metabolite Annotation in Liquid Chromatography–High-Resolution Mass Spectrometry Data. *Anal. Chem.* 2022; 94: 8561–8569. <https://doi.org/10.1021/acs.analchem.1c04783> PMID: 35670335
26. Aoyagi S, Mizomichi K, Kamochi K, Miisho A. Interpretation of TOF-SIMS data based on information entropy of spectra. *Surf Interface Anal.* 2022; 54:356–362. <https://doi.org/10.1002/sia.7047>
27. Yamada H, Xu L, Eto F, Takeichi R, Islam A, Mamun MAI, et al. Changes of Mass Spectra Patterns on a Brain Tissue Section Revealed by Deep Learning with Imaging Mass Spectrometry Data. *J Am Soc Mass Spectrom.* 2022. <https://doi.org/10.1021/jasms.2c00080> PMID: 35881989
28. Hosokawa Y, Masaki N, Takei S, Horikawa M, Matsushita S, Sugiyama E, et al. Recurrent triple-negative breast cancer (TNBC) tissues contain a higher amount of phosphatidylcholine (32:1) than non-recurrent TNBC tissues. *PLoS One.* 2017; 12: 1–13. <https://doi.org/10.1371/journal.pone.0183724> PMID: 28832678
29. Tamura K, Horikawa M, Sato S, Miyake H, Setou M. Discovery of lipid biomarkers correlated with disease progression in clear cell renal cell carcinoma using desorption electrospray ionization imaging mass spectrometry. *Oncotarget.* 2019; 10: 1688–1703. <https://doi.org/10.18632/oncotarget.26706> PMID: 30899441
30. Islam A, Takeyama E, Mamun MAI, Sato T, Horikawa M, Takahashi Y, et al. Green nut oil or dha supplementation restored decreased distribution levels of dha containing phosphatidylcholines in the brain of a mouse model of dementia. *Metabolites.* 2020; 10: 1–12. <https://doi.org/10.3390/metabo10040153> PMID: 32316172
31. Nampei M, Horikawa M, Ishizu K, Yamazaki F, Yamada H, Kahyo T, et al. Unsupervised machine learning using an imaging mass spectrometry dataset automatically reassembles grey and white matter. *Sci Rep.* 2019; 9: 1–11. <https://doi.org/10.1038/s41598-019-49819-1> PMID: 31519997
32. Takeda R, Islam A, Sato T, Kurita H, Kahyo T, Urano T, et al. The stability of the metabolic turnover of arachidonic acid in human unruptured intracranial aneurysmal walls is sustained. *Clin Neurol Neurosurg.* 2021; 208: 106881. <https://doi.org/10.1016/j.clineuro.2021.106881> PMID: 34418699
33. Park S, Kim BK, Park SK. Supplementation with phosphatidylethanolamine confers anti-oxidant and anti-aging effects via hormesis and reduced insulin/IGF-1-like signaling in *C. elegans*. *Mech Ageing Dev.* 2021; 197: 111498. <https://doi.org/10.1016/j.mad.2021.111498> PMID: 33974957
34. Zhao YY, Cheng X long, Lin RC. Lipidomics Applications for Discovering Biomarkers of Diseases in Clinical Chemistry. *International Review of Cell and Molecular Biology.* Elsevier Inc.; 2014. <https://doi.org/10.1016/B978-0-12-800177-6.00001-3> PMID: 25376488
35. Sugiura Y, Mitsutoshi Setou. Selective imaging of positively charged polar and nonpolar lipids by optimizing matrix solution composition. *Rapid Commun Mass Spectrom.* 2009; 23: 3269–3278. <https://doi.org/10.1002/rcm.4242> PMID: 19760647
36. Kaneko Y, Obata Y, Nishino T, Kakeya H, Miyazaki Y, Hayasaka T, et al. Imaging mass spectrometry analysis reveals an altered lipid distribution pattern in the tubular areas of hyper-IgA murine kidneys. *Exp Mol Pathol.* 2011; 91: 614–621. <https://doi.org/10.1016/j.yexmp.2011.07.002> PMID: 21798258
37. Moreno-Gordaliza E, Esteban-Fernández D, Lázaro A, Aboulmagd S, Humanes B, Tejedor A, et al. Lipid imaging for visualizing cilastatin amelioration of cisplatin-induced nephrotoxicity. *J Lipid Res.* 2018; 59: 1561–1574. <https://doi.org/10.1194/jlr.M080465> PMID: 30049708
38. Moreno-Gordaliza E, Esteban-Fernández D, Lázaro A, Humanes B, Aboulmagd S, Tejedor A, et al. MALDI-LTQ-Orbitrap mass spectrometry imaging for lipidomic analysis in kidney under cisplatin chemotherapy. *Talanta.* 2017; 164: 16–26. <https://doi.org/10.1016/j.talanta.2016.11.026> PMID: 28107912
